# Supplementary material for: Towards a better understanding of the low recall of insertion variants with short-read based variant callers
Source: PubMed Central journal article supplement (PMC7640490; doi:10.1186/s12864-020-07125-5), 2020-11-04
Supplement: 12864_2020_7125_MOESM1_ESM.pdf [file 12864_2020_7125_MOESM1_ESM.pdf]

**ADDITIONAL FILE**

# Additional file for: Towards a better understanding of the low recall of insertion variants with short-read based variant callers

Wesley J Delage<sup>1\*</sup>, Julien Thevenon<sup>2</sup> and Claire Lemaitre<sup>1</sup>

\*Correspondence:  
wesley.delage@irisa.fr  
<sup>1</sup>Univ Rennes, CNRS, Inria, IRISA,  
UMR 6074, F-35000 Rennes,  
France  
Full list of author information is  
available at the end of the article

## Contents

|          |                                                                                         |          |
|----------|-----------------------------------------------------------------------------------------|----------|
| <b>1</b> | <b>Characteristics of the studied callsets</b>                                          | <b>2</b> |
| <b>2</b> | <b>Characterization of insertion callsets</b>                                           | <b>3</b> |
| 2.1      | Annotation of insertions . . . . .                                                      | 3        |
| 2.2      | Distributions of insertion variant features across several callsets . . .               | 3        |
| 2.3      | Proportions of SR-based insertion discoveries according to insertion features . . . . . | 4        |
| <b>3</b> | <b>Additional simulation results</b>                                                    | <b>5</b> |
| 3.1      | Recall of SV callers without any quality filter . . . . .                               | 5        |
| 3.2      | False positive amounts . . . . .                                                        | 6        |
| 3.3      | Insertion recall of short read vs long read SV callers . . . . .                        | 7        |

## 1 Characteristics of the studied callsets

**Table 1** Sequencing technologies, sequencing coverage and SV callers used to generate the four high confidence SV callsets that were studied in this work.

| Study                   | Individual                    | Sequencing technology                                                                                          | Sequence coverage                      | SV discovery                                                                                                                                              | SV validation                                                       |
|-------------------------|-------------------------------|----------------------------------------------------------------------------------------------------------------|----------------------------------------|-----------------------------------------------------------------------------------------------------------------------------------------------------------|---------------------------------------------------------------------|
| Chaisson et al 2019 [1] | NA19240<br>HG00514<br>HG00733 | Illumina short insert<br>Illumina liWGS<br>Illumina 7kbp JMP                                                   | 77<br>3<br>1                           | dCGH, Delly, GenomeStrip,<br>NovoBreak,Pindel, retroCNV,<br>SVelter, VH, Wham,<br>Lumpy, ForestSV, Manta,<br>MELT, Tardis_MEI, liWGS                      | Long read alignment<br>Optical mapping                              |
|                         |                               | 10X Chromium<br>BioNanoGenomics<br>Tru-Seq SLR<br>Strand-Seq<br>Hi-C<br>PacBio<br>Oxford Nanopore<br>(HG00733) | 245<br>113<br>4<br>7<br>17<br>38<br>19 | No dedicated SV caller<br>Home made strategy<br>based on haplotype<br>assembly and alignment<br>on reference genome                                       |                                                                     |
| Zook et al 2019 [2]     | HG002                         | Illumina HiSeq                                                                                                 | 300                                    | Spirale Genetics tools,<br>GATK-HC,Freebayes,<br>Fermikits, MetaSV, TNscope,<br>Scalpel, SvABA, Krunch,<br>Cortex,Manta,<br>Seven Graph Bridge Refinement | Optical mapping<br>(Bionano and Nabsys)<br>Assembly with SVanalyzer |
|                         |                               | 10X Genomics<br>Complete Genomics<br>PacBio                                                                    | 86<br>100<br>44                        | LongRanger<br>CGATools<br>PbSv<br>Assembly and alignment (Assemblytics)<br>Hybrid : HySA, BreakScan                                                       |                                                                     |

## 2 Characterization of insertion callsets

### 2.1 Annotation of insertions

**Table 2** Annotation of the insertion callset of individual NA19240 according to the minimal sequence coverage threshold. Bracketed values correspond to the category percentage among the annotated insertions.

| % Coverage                   | 100            | 95             | 80             | 60             | 40             |
|------------------------------|----------------|----------------|----------------|----------------|----------------|
| <b>New sequence</b>          | 677<br>(10%)   | 686<br>(6%)    | 869<br>(6%)    | 1,223<br>(8%)  | 1,639<br>(11%) |
| <b>Mobile element</b>        | 605<br>(9%)    | 2,047<br>(17%) | 2,473<br>(18%) | 2,828<br>(19%) | 3,321<br>(22%) |
| <b>Tandem repeat</b>         | 4,399<br>(65%) | 7,552<br>(62%) | 8,735<br>(63%) | 9,102<br>(62%) | 9,235<br>(61%) |
| <b>Tandem duplication</b>    | 444<br>(7%)    | 953<br>(8%)    | 1,000<br>(7%)  | 1,081<br>(7%)  | 1,082<br>(7%)  |
| <b>Dispersed duplication</b> | 486<br>(7%)    | 816<br>(7%)    | 774<br>(6%)    | 767<br>(5%)    | 713<br>(5%)    |
| <b>Unassigned</b>            | 8,890          | 3,456          | 1,843          | 1,046          | 473            |
| <b>% annotated</b>           | 43.4           | 78.0           | 88.3           | 93.3           | 97.0           |

### 2.2 Distributions of insertion variant features across several callsets

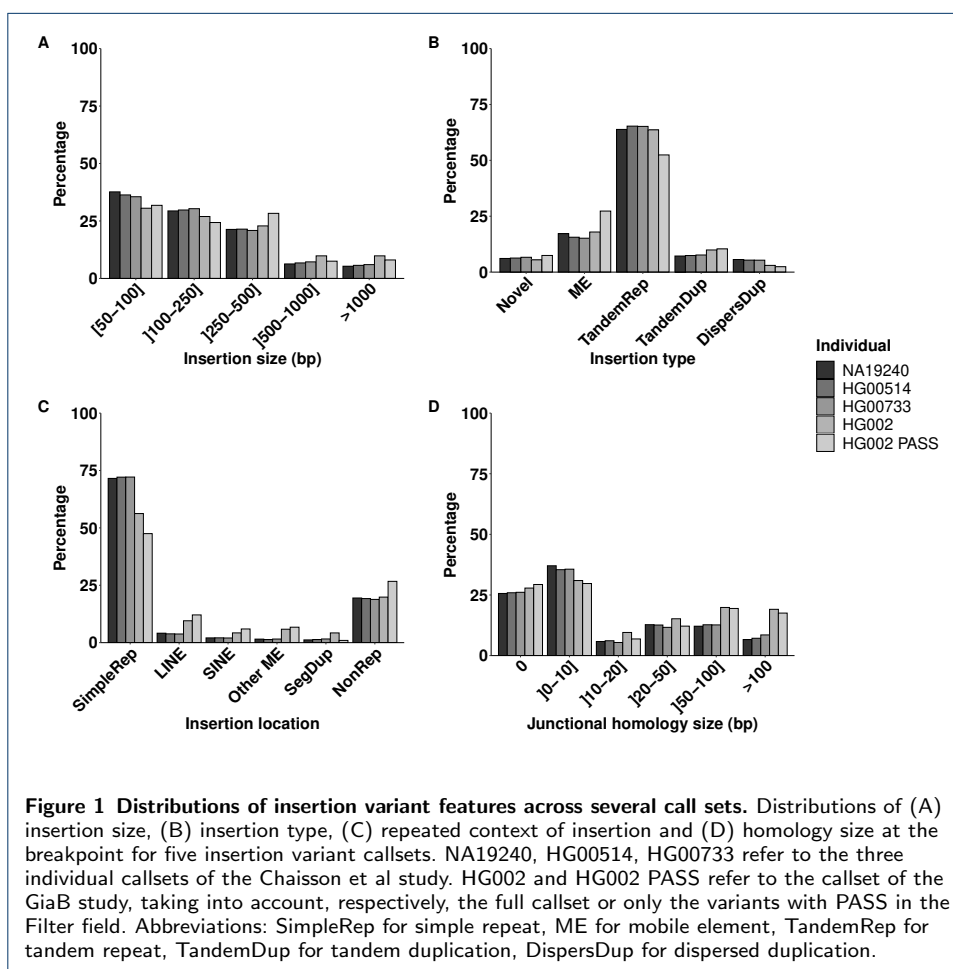

2.3 Proportions of SR-based insertion discoveries according to insertion features

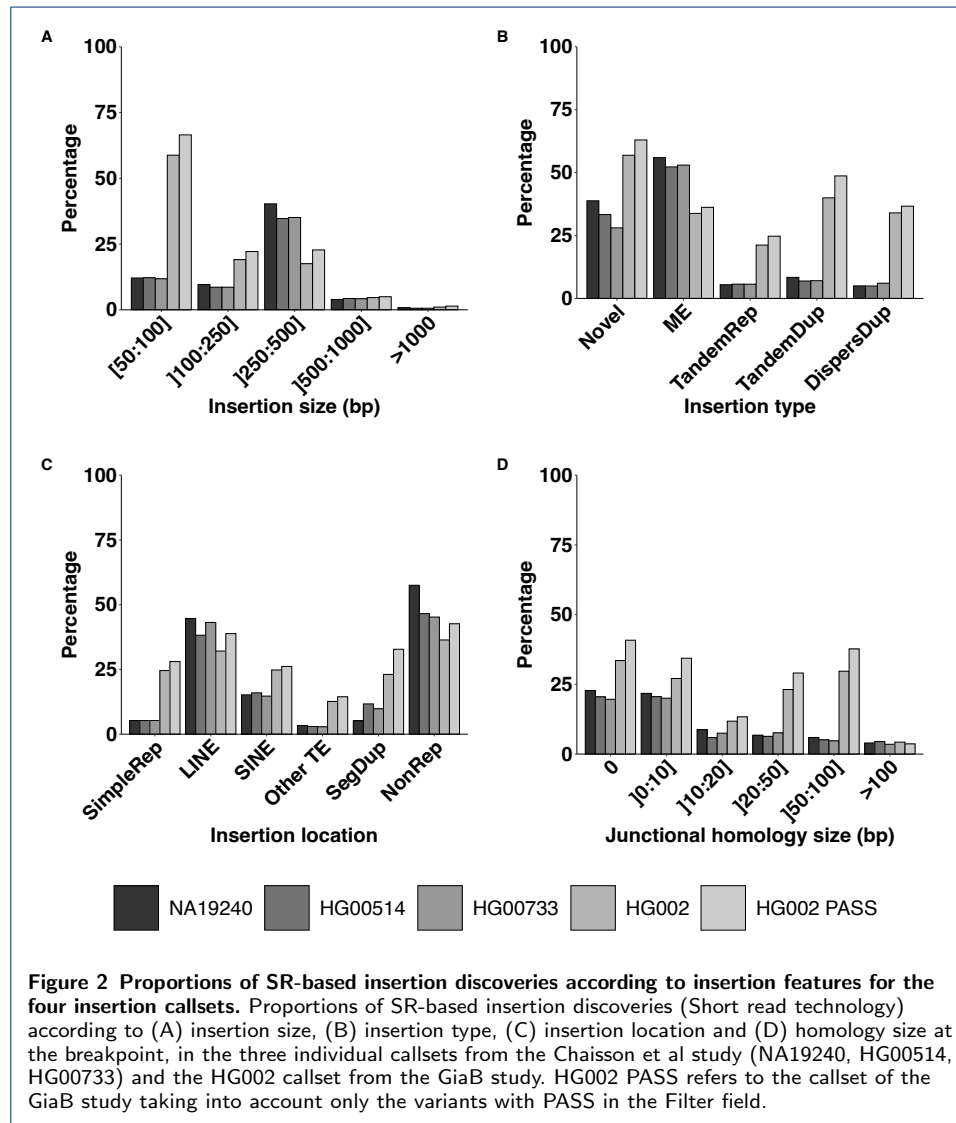

### 3 Additional simulation results

#### 3.1 Recall of SV callers without any quality filter

**Table 3 Insertion site recall of several SV callers without any quality filter applied.** For each SV caller, all predicted calls output in the final vcf file were taken into account regardless of their value in the FILTER field. Only the insertion site location is taken into account to compute the recall. Each line corresponds to a distinct simulation scenario. Cells of the table are colored according to the variation of the recall value of the given tool with respect to the recall obtained with the baseline simulation (first line, colored in blue): cells in red show a loss of recall >10%, cells in grey show no difference compared to baseline recall at +/- 10%.

|                                                             |                                    | Insertion site only recall - no quality filter (%) |       |       |            |
|-------------------------------------------------------------|------------------------------------|----------------------------------------------------|-------|-------|------------|
|                                                             |                                    | GRIDSS                                             | Manta | SvABA | MindTheGap |
| <b>Baseline simulation: 250 bp novel sequences in exons</b> |                                    | 100                                                | 100   | 100   | 100        |
| <b>Scenario 1</b>                                           | 50 bp                              | 100                                                | 100   | 100   | 100        |
|                                                             | 500 bp                             | 100                                                | 86    | 6     | 99         |
|                                                             | 1,000 bp                           | 100                                                | 88    | 1     | 98         |
| <b>Scenario 2</b>                                           | Dispersed duplication              | 100                                                | 49    | 100   | 96         |
|                                                             | Tandem duplication                 | 100                                                | 100   | 100   | 0          |
|                                                             | Mobile element                     | 100                                                | 50    | 100   | 58         |
|                                                             | Tandem repeat (6 bp pattern)       | 100                                                | 92    | 22    | 0          |
|                                                             | Tandem repeat (25 bp pattern)      | 100                                                | 66    | 100   | 2          |
| <b>Scenario 3</b>                                           | 10 bp                              | 100                                                | 100   | 98    | 0          |
|                                                             | 20 bp                              | 100                                                | 100   | 89    | 0          |
|                                                             | 50 bp                              | 100                                                | 51    | 65    | 0          |
|                                                             | 100 bp                             | 100                                                | 12    | 100   | 0          |
|                                                             | 150 bp                             | 100                                                | 0     | 100   | 0          |
| <b>Scenario 4</b>                                           | Non repeat                         | 100                                                | 100   | 98    | 83         |
|                                                             | Simple repeat (<300 bp)            | 100                                                | 100   | 100   | 73         |
|                                                             | Simple repeat (>300 bp)            | 99                                                 | 94    | 100   | 58         |
|                                                             | SINE                               | 100                                                | 100   | 100   | 53         |
|                                                             | LINE                               | 100                                                | 100   | 100   | 90         |
|                                                             | Distance between insertion <150 bp | 100                                                | 85    | 77    | 77         |
|                                                             | Real locations                     | 96                                                 | 81    | 90    | 38         |
| <b>Scenario 5: real insertions at real locations</b>        |                                    | 65                                                 | 37    | 70    | 6          |

### 3.2 False positive amounts

**Table 4 Amounts of false positives called by the tested SV callers according to different simulation scenarios.** For each scenario involving several simulated datasets, the values indicate the minimal and maximal number of false positive predictions obtained over these datasets. Cells of the table are colored according to the variation of the FP amount of the given tool with respect to the amount obtained with the baseline simulation (first line, colored in blue): cells in red show a substantial increase of FP amount, cells in grey show small difference or a decrease of FP amount compared to the baseline simulation.

|                                        | Amount of False positive calls |           |        |         |         |            |            |         |
|----------------------------------------|--------------------------------|-----------|--------|---------|---------|------------|------------|---------|
|                                        | GRIDSS                         |           | Manta  |         | SvABA   |            | MindTheGap |         |
|                                        | PASS                           | All       | PASS   | All     | PASS    | All        | PASS       | All     |
| <b>Baseline simulation</b>             | 0                              | 151       | 2      | 2       | 6       | 84         | 19         | 19      |
| <b>Scenario 1: Insertion size</b>      | 0                              | 131 - 138 | 0 - 3  | 0 - 3   | 0 - 6   | 82 - 96    | 16 - 19    | 16 - 19 |
| <b>Scenario 2: Insertion type</b>      | 3 - 400                        | 233 - 591 | 0 - 18 | 0 - 201 | 4 - 451 | 92 - 1,157 | 17 - 19    | 17 - 19 |
| <b>Scenario 3: Junctional homology</b> | 2 - 9                          | 128 - 163 | 0 - 4  | 0 - 4   | 5 - 202 | 70 - 342   | 2 - 18     | 2 - 18  |
| <b>Scenario 4: Genomic location</b>    | 0 - 4                          | 143 - 166 | 0 - 5  | 0 - 5   | 4 - 13  | 74 - 643   | 16 - 19    | 16 - 19 |
| <b>Scenario 5: Real insertions</b>     | 382                            | 2,052     | 101    | 148     | 523     | 9,314      | 19         | 19      |

### 3.3 Insertion recall of short read vs long read SV callers

**Table 5 Insertion site and sequence resolved recalls of a short-read insertion caller, GRIDSS, and a long-read insertion caller, Sniffles, according to different simulation scenarios.** Cells of the table are colored according to the variation of the recall value of the given tool with respect to the recall obtained with the baseline simulation (first line, colored in blue): cells in red show a loss of recall >10%, cells in grey show no difference compared to baseline recall at +/- 10%. Sequence-resolved recalls were computed with a sequence identity threshold of 90 %, except for the numbers in brackets for which the threshold was lowered to 80 %.

|                                                        |                                   | Insertion site only recall (%) |                        | Sequence resolved recall (%) |                        |
|--------------------------------------------------------|-----------------------------------|--------------------------------|------------------------|------------------------------|------------------------|
|                                                        |                                   | short reads<br>GRIDSS          | long reads<br>Sniffles | short reads<br>GRIDSS        | long reads<br>Sniffles |
| <b>Baseline simulation: 250 bp novel seq. in exons</b> |                                   | 83                             | 100                    | 81                           | 27 (100)               |
| <b>Scenario 1<br/>Insertion<br/>size</b>               | 50 bp                             | 56                             | 100                    | 56                           | 33 (100)               |
|                                                        | 500 bp                            | 100                            | 100                    | 0                            | 19 (100)               |
|                                                        | 1,000 bp                          | 100                            | 100                    | 0                            | 15 (100)               |
| <b>Scenario 2<br/>Insertion<br/>type</b>               | Dispersed duplication             | 100                            | 100                    | 0                            | 20 (100)               |
|                                                        | Tandem duplication                | 100                            | 15                     | 0                            | 0 (8)                  |
|                                                        | Mobile element                    | 100                            | 100                    | 0                            | 23 (100)               |
|                                                        | Tandem repeat (6 bp pattern)      | 100                            | 100                    | 0                            | 14 (100)               |
|                                                        | Tandem repeat (25 bp pattern)     | 99                             | 95                     | 0                            | 10 (95)                |
| <b>Scenario 3<br/>Junctional<br/>homology</b>          | 10 bp                             | 100                            | 100                    | 99                           | 9 (100)                |
|                                                        | 20 bp                             | 100                            | 91                     | 100                          | 5 (90)                 |
|                                                        | 50 bp                             | 77                             | 47                     | 6                            | 2 (42)                 |
|                                                        | 100 bp                            | 100                            | 24                     | 0                            | 0 (11)                 |
|                                                        | 150 bp                            | 100                            | 11                     | 0                            | 0 (6)                  |
| <b>Scenario 4<br/>Genomic<br/>location</b>             | Non repeat                        | 83                             | 100                    | 80                           | 22 (100)               |
|                                                        | Simple repeat (<300 bp)           | 82                             | 100                    | 77                           | 25 (100)               |
|                                                        | Simple repeat (>300 bp)           | 87                             | 100                    | 77                           | 19 (100)               |
|                                                        | SINE                              | 90                             | 100                    | 77                           | 21 (100)               |
|                                                        | LINE                              | 80                             | 100                    | 76                           | 25 (100)               |
|                                                        | Clustered insertions (<150 bp)    | 85                             | 54                     | 75                           | 8 (45)                 |
| <b>Scenario 5<br/>Real insertions</b>                  | Novel sequences at real locations | 84                             | 58                     | 64                           | 15 (46)                |
|                                                        | Real insertions in exonic regions | 84                             | 98                     | 11                           | 5 (21)                 |
|                                                        | Real insertions at real locations | 39                             | 58                     | 6                            | 7 (49)                 |

**Table 6 Comparison of Sniffles recall values obtained with different validation methods.** Recalls in the first two columns were obtained with the methodology described in the main manuscript (ie. +/- 10 bp for insertion site recalls and at least 90 % identity for sequence-resolved recalls). Recalls in the third column named SVanalyzer were obtained with the validation tool developed by GiaB, SVanalyzer/SVbenchmark with option -maxdist set to 10 bp and -minsize set to 50. Cells of the table are colored according to the variation of the recall value of the given tool with respect to the recall obtained with the baseline simulation (first line, colored in blue): cells in red show a loss of recall >10%, cells in grey show no difference compared to baseline recall at +/- 10%. Sequence-resolved recalls were computed with a sequence identity threshold of 90 %, except for the numbers in brackets for which the threshold was lowered to 80 %.

|                                                 |                                   | Method from the study |                       | SVanalyzer |
|-------------------------------------------------|-----------------------------------|-----------------------|-----------------------|------------|
|                                                 |                                   | Site only (%)         | Sequence resolved (%) | Recall     |
| Baseline simulation: 250 bp novel seq. in exons |                                   | 100                   | 27 (100)              | 99.5       |
| Scenario 1<br>Insertion<br>size                 | 50 bp                             | 100                   | 33 (100)              | 100        |
|                                                 | 500 bp                            | 100                   | 19 (100)              | 99.5       |
|                                                 | 1,000 bp                          | 100                   | 15 (100)              | 99.5       |
| Scenario 2<br>Insertion<br>type                 | Dispersed duplication             | 100                   | 20 (100)              | 99.5       |
|                                                 | Tandem duplication                | 15                    | 0 (8)                 | 15         |
|                                                 | Mobile element                    | 100                   | 23 (100)              | 99.5       |
|                                                 | Tandem repeat (6 bp pattern)      | 100                   | 14 (100)              | 99.5       |
|                                                 | Tandem repeat (25 bp pattern)     | 95                    | 10 (95)               | 99.5       |
| Scenario 3<br>Junctional<br>homology            | 10 bp                             | 100                   | 9 (100)               | 99.5       |
|                                                 | 20 bp                             | 91                    | 5 (90)                | 90         |
|                                                 | 50 bp                             | 47                    | 2 (42)                | 47         |
|                                                 | 100 bp                            | 24                    | 0 (11)                | 24         |
|                                                 | 150 bp                            | 11                    | 0 (6)                 | 11         |
| Scenario 4<br>Genomic<br>location               | Non repeat                        | 100                   | 22 (100)              | 100        |
|                                                 | Simple repeat (<300 bp)           | 100                   | 25 (100)              | 99.5       |
|                                                 | Simple repeat (>300 bp)           | 100                   | 19 (100)              | 99.5       |
|                                                 | SINE                              | 100                   | 21 (100)              | 99.5       |
|                                                 | LINE                              | 100                   | 25 (100)              | 99.5       |
|                                                 | Clustered insertions (<150 bp)    | 54                    | 8 (45)                | 54         |
| Scenario 5<br>Real insertions                   | Novel sequences at real locations | 80                    | 15 (78)               | 81         |
|                                                 | Real insertions in exonic regions | 98                    | 5 (21)                | 98         |
|                                                 | Real insertions at real locations | 58                    | 7 (49)                | 57         |



**Author details**

<sup>1</sup>Univ Rennes, CNRS, Inria, IRISA, UMR 6074, F-35000 Rennes, France. <sup>2</sup>Unité de Génétique Clinique, Pôle Couple Enfant, CHU de Grenoble Site Nord-Hôpital Couple-Enfant, 38043 Grenoble, France.

**References**

1. Chaisson, M.J.P., Sanders, A.D., ..., Marschall, T., Korb, J., Eichler, E.E., Lee, C.: Multi-platform discovery of haplotype-resolved structural variation in human genomes. *Nature Communications* **10**, 1784 (2019). doi:10.1038/s41467-018-08148-z
2. Zook, J.M., Hansen, N.F., Olson, N.D., Chapman, L., Mullikin, J.C., Xiao, C., Sherry, S., Koren, S., Phillippy, A.M., Boutros, P.C., *et al.*: A robust benchmark for detection of germline large deletions and insertions. *Nature Biotechnology* (2020). doi:10.1038/s41587-020-0538-8
